# Supplementary material for: Template-free synthesis of monodisperse Cu2WO4(OH)2 round and elliptical hollow spheres with a ligand-assisted dissolution process
Source: Royal Society of Chemistry journal article supplement (doi:10.1039/b914086g), 2009-01-01
Supplement: b914086g.pdf [file b914086g.pdf]

Electronic Supplementary Information For

**Template-free Synthesis of Monodisperse  $\text{Cu}_2\text{WO}_4(\text{OH})_2$**

**Round and Elliptical Hollow Spheres with a**

**Ligand-assisted Dissolution Process**

Wei Cheng, Kaibin Tang,\* Zhongping Liu, Jie Sheng and Yunxia Qi

Division of Nanomaterials and Chemistry, Hefei National Laboratory for Physical Sciences at

the Microscale, Department of Chemistry, University of Science and Technology of China,

Hefei, 230026, P.R. China, Fax: + 86-551-3601791 Tel: + 86-551-3601791

E-mail: [kbtang@ustc.edu.cn](mailto:kbtang@ustc.edu.cn).

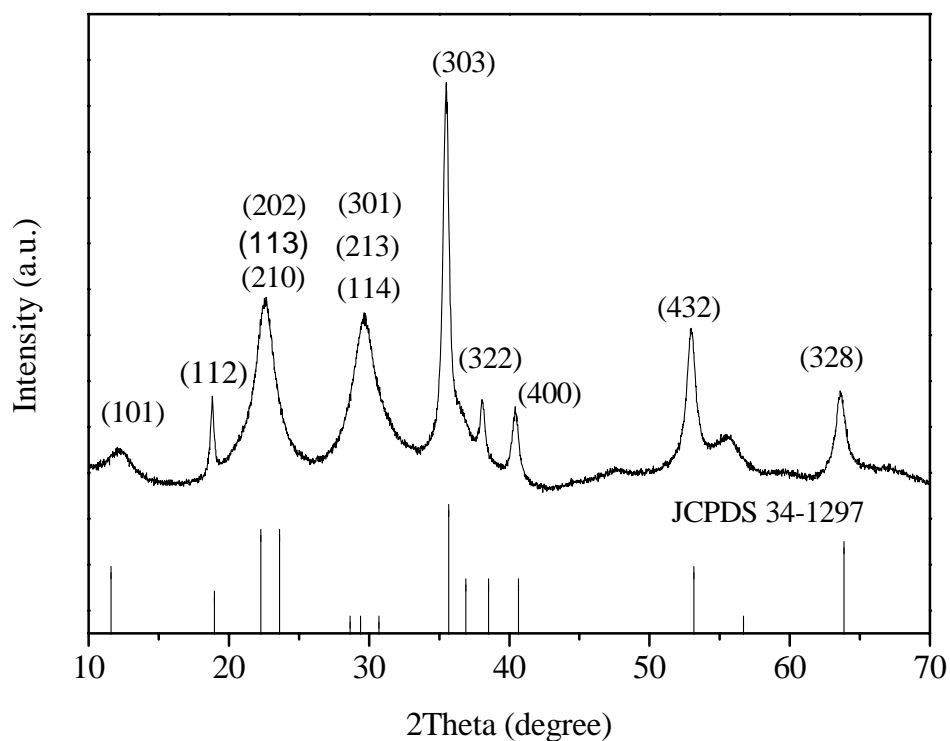

**Fig. S1** XRD pattern of the green product obtained in the typical synthesis. The broad peak at 47.6 degree (2 theta) is attributed to diffraction of (226) and/or (404) planes.

Supplementary Material (ESI) for Chemical Communications

This journal is (c) The Royal Society of Chemistry 2009

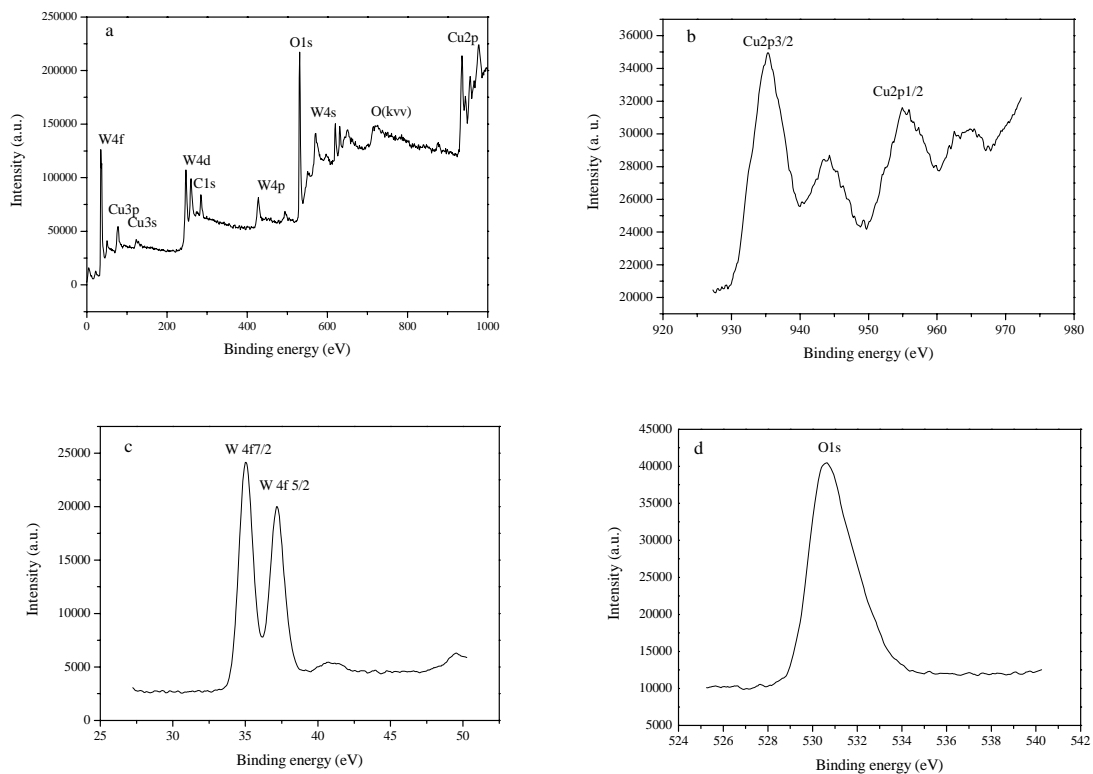

**Fig. S2** (a) Survey XPS spectrum of the product in the typical synthesis. (b) core-level spectrum for Cu2p. (c) core-level spectrum for W4f. (d) core-level spectrum for O1s.

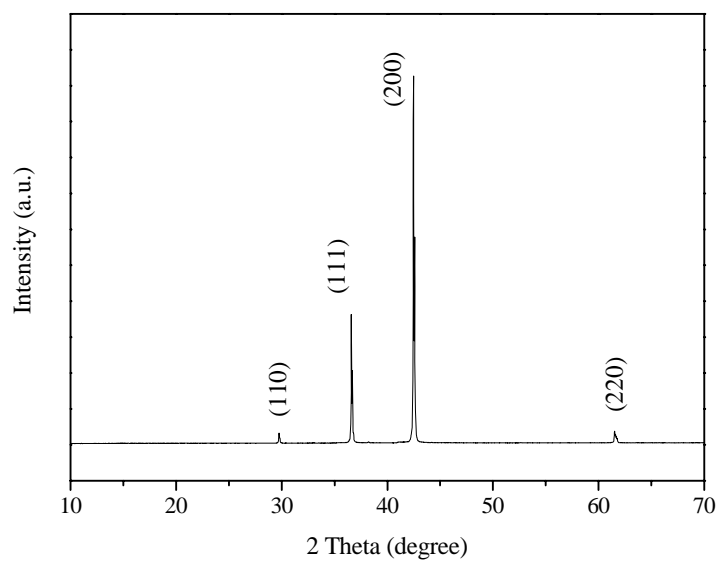

**Fig.S3** XRD pattern of the red product.

Supplementary Material (ESI) for Chemical Communications

This journal is (c) The Royal Society of Chemistry 2009

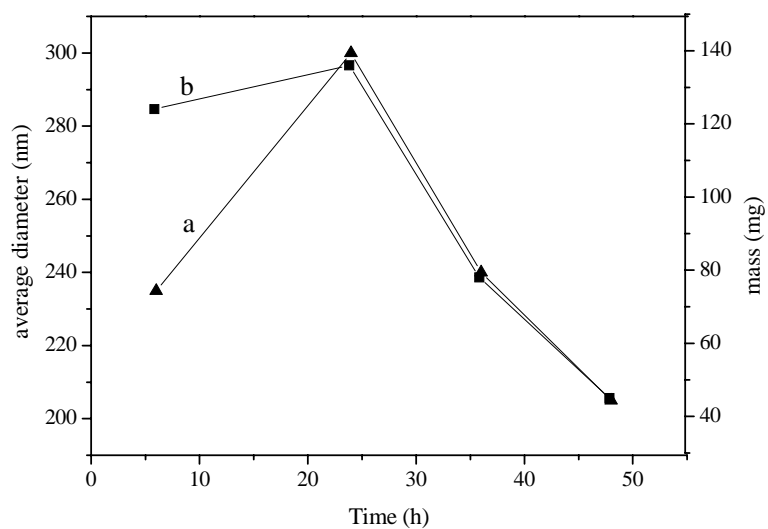

**Fig. S4** (a) The diameters of the spheres prepared at different reaction time. (b) The mass of the product prepared at different reaction time.

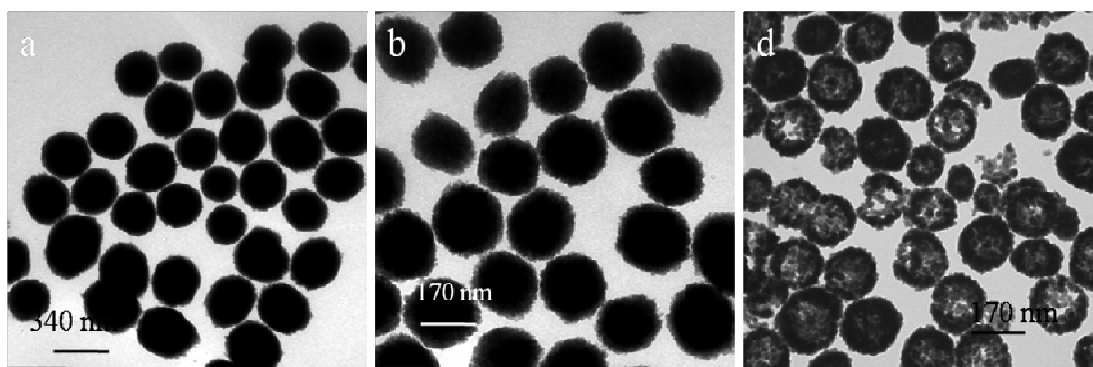

**Fig. S5** TEM images of the product prepared at different temperature. (a) 120 °C for 96 h, (b) 140 °C for 96 h. (c) 180 °C for 18 h. other condition are the same with the typical synthesis.
